# Supplementary material for: Extracellular Vesicles and Their Zeta Potential as Future Markers Associated with Nutrition and Molecular Biomarkers in Breast Cancer
Source: MDPI journal article supplement (doi:10.3390/ijms24076810), 2023-04-06
Supplement: s1 [file s1]

**Table S1.** Design of miRNA-30 primers

| Sequence – FORWARD QPCR PRIMER                                        |  | 25nmole DNA Oligo, 21 bases                             |            |
|-----------------------------------------------------------------------|--|---------------------------------------------------------|------------|
| 5'- CAC GCA TGT AAA CAT CCC CGA – 3'                                  |  |                                                         |            |
| <b>Properties</b>                                                     |  | <b>Amount of Oligo</b>                                  |            |
| <i>T<sub>m</sub></i> (50mM NaCl): 57.7 °C                             |  | 4.7=                                                    | 23.1 =0.15 |
| GC Content: 52.4%                                                     |  | OD <sub>260</sub>                                       | nmoles mg  |
| <i>Molecular weight</i> : 6344.2                                      |  | For 100 µM: add 231µL                                   |            |
| nmoles/OD260: 4.9                                                     |  |                                                         |            |
| ug/OD260: 31.1                                                        |  |                                                         |            |
| Ext. Coefficient: 202,800 L/(mole-cm)                                 |  |                                                         |            |
| <b>Secondary structure calculations</b>                               |  |                                                         |            |
| Lowest folding free energy (kcal/mole): -0.22 at 25°C                 |  |                                                         |            |
| Strongest folding <i>T<sub>m</sub></i> : 28.1 °C                      |  |                                                         |            |
| Sequence – REVERSE QPCR PRIMER                                        |  | 25nmole DNA Oligo, 20 bases                             |            |
| 5'-CCA GTG CAG GGT CCG AGG TA– 3'                                     |  |                                                         |            |
| <b>Properties</b>                                                     |  | <b>Amount of Oligo</b>                                  |            |
| <i>T<sub>m</sub></i> (50mM NaCl): 61.3 °C                             |  | 4.7=                                                    | 21.4 =0.13 |
| GC Content: 65%                                                       |  | OD <sub>260</sub>                                       | nmoles mg  |
| <i>Molecular weight</i> : 6,183                                       |  | For 100 µM: add 214µL                                   |            |
| nmoles/OD260: 5.1                                                     |  |                                                         |            |
| ug/OD260: 31.4                                                        |  |                                                         |            |
| Ext. Coefficient: 196,900 L/(mole-cm)                                 |  |                                                         |            |
| <b>Secondary structure calculations</b>                               |  |                                                         |            |
| Lowest folding free energy (kcal/mole): 0.61 at 25°C                  |  |                                                         |            |
| Strongest folding <i>T<sub>m</sub></i> : 13 °C                        |  |                                                         |            |
| Sequence – OLIGO DE RT                                                |  | 25nmole DNA Oligo, 50 bases                             |            |
| <b>Properties</b>                                                     |  | <b>Amount of Oligo</b>                                  |            |
| <i>T<sub>m</sub></i> (50mM NaCl): 71 °C                               |  | 10=                                                     | 21.1 =0.32 |
| GC Content: 56%                                                       |  | OD <sub>260</sub>                                       | nmoles mg  |
| <i>Molecular weight</i> : 153,378                                     |  | For 100 µM: add 211µL                                   |            |
| nmoles/OD260: 2.1                                                     |  |                                                         |            |
| ug/OD260: 32.3                                                        |  |                                                         |            |
| Ext. Coefficient: 476,500 L/(mole-cm)                                 |  |                                                         |            |
| <b>Secondary structure calculations</b>                               |  |                                                         |            |
| Lowest folding free energy (kcal/mole): -14.50 at 25°C                |  |                                                         |            |
| Strongest folding <i>T<sub>m</sub></i> : 68.6 °C                      |  |                                                         |            |
| Sequence –SONDA MIR30D                                                |  | 100 nm PrimeTime MGB Probe 5'6-FAM/ 3'MGB-NFQ, 17 bases |            |
| 5'- /56-FAM/CTG GAT ACG ACC TTC CA/3MGB-NFQ/- 3'                      |  |                                                         |            |
| <b>Properties</b>                                                     |  | <b>Amount of Oligo</b>                                  |            |
| GC Content: 52.9%                                                     |  | 100 µM in 232µL IDTE Buffer pH 8.0                      |            |
| <i>Molecular weight</i> : 6,788.1                                     |  |                                                         |            |
| nmoles/OD260: 4.3                                                     |  |                                                         |            |
| ug/OD260: 29.1                                                        |  |                                                         |            |
| Ext. Coefficient: 233,360 L/(mole-cm)                                 |  |                                                         |            |
| <b>Secondary structure calculations</b>                               |  |                                                         |            |
| Lowest folding free energy (kcal/mole): -0.80 at 25°C                 |  |                                                         |            |
| Strongest folding <i>T<sub>m</sub></i> : 33.3 °C                      |  |                                                         |            |
| Secondary structure should not affect yield or purity for this oligo. |  |                                                         |            |
